# Supplementary material for: Quitting activity and use of cessation assistance reported by smokers in eight European countries: Findings from the EUREST-PLUS ITC Europe Surveys
Source: PubMed Central journal article supplement (PMC6659556; doi:10.18332/tid/98912), 2018-12-21
Supplement: TID-16-A6-s1.pdf [file TID-16-A6-s1.pdf]

**Supplementary Table S1. Country ranking for quitting activity and used cessation assistance**

|                                     | <b>Country ranking</b>                                                                                                                                                                                       |
|-------------------------------------|--------------------------------------------------------------------------------------------------------------------------------------------------------------------------------------------------------------|
| Made quit attempt in past 12 months | <ol style="list-style-type: none"> <li>1. England</li> <li>2. The Netherlands</li> <li>3. Romania</li> <li>4. Spain</li> <li>5. Germany</li> <li>6. Poland</li> <li>7. Greece</li> <li>8. Hungary</li> </ol> |
| Intends to quit within 1 months     | <ol style="list-style-type: none"> <li>1. England</li> <li>2. The Netherlands</li> <li>3. Romania</li> <li>4. Spain</li> <li>5. Poland</li> <li>6. Germany</li> <li>7. Hungary</li> <li>8. Greece</li> </ol> |
| Used medication*                    | <ol style="list-style-type: none"> <li>1. England</li> <li>2. The Netherlands</li> <li>3. Poland</li> <li>4. Romania</li> <li>5. Spain</li> <li>6. Germany</li> <li>7. Hungary</li> <li>8. Greece</li> </ol> |
| Used quitline**                     | <ol style="list-style-type: none"> <li>1. England</li> <li>2. Poland</li> <li>3. The Netherlands</li> <li>4. Germany</li> <li>5. Romania</li> <li>6. Greece</li> <li>7. Hungary</li> <li>8. Spain</li> </ol> |
| Used internet**                     | <ol style="list-style-type: none"> <li>1. England</li> <li>2. The Netherlands</li> <li>3. Poland</li> <li>4. Germany</li> <li>5. Romania</li> <li>6. Hungary</li> <li>7. Greece</li> <li>8. Spain</li> </ol> |
| Used smoking cessation service**    | <ol style="list-style-type: none"> <li>1. England</li> <li>2. The Netherlands</li> <li>3. Spain</li> <li>4. Poland</li> <li>5. Greece</li> <li>6. Germany</li> <li>7. Hungary</li> <li>8. Romania</li> </ol> |
| Used e-cigarettes to quit           | <ol style="list-style-type: none"> <li>1. England</li> <li>2. The Netherlands</li> <li>3. Greece</li> <li>4. Hungary</li> <li>5. Germany</li> <li>6. Poland</li> <li>7. Romania</li> <li>8. Spain</li> </ol> |

---

|                                          |    |                 |
|------------------------------------------|----|-----------------|
| Received advice about quitting           | 1. | Romania         |
| from health professional during visit*** | 2. | Greece          |
|                                          | 3. | Spain           |
|                                          | 4. | Germany         |
|                                          | 5. | England         |
|                                          | 6. | The Netherlands |
|                                          | 7. | Hungary         |
|                                          | 8. | Poland          |

---

|                                                    |    |                 |
|----------------------------------------------------|----|-----------------|
| Talked about e-cigarettes with health professional | 1. | Hungary         |
|                                                    | 2. | Romania         |
|                                                    | 3. | England         |
|                                                    | 4. | The Netherlands |
|                                                    | 5. | Greece          |
|                                                    | 6. | Poland          |
|                                                    | 7. | Spain           |
|                                                    | 8. | Germany         |

---

\*Netherlands: in the last 12 months. Other countries: as part of your last quit attempt.

\*\*Netherlands: in the last 6 months. Other countries: as part of your last quit attempt.

\*\*\*Netherlands: in the last 6 months. Other countries: in the last 12 months.
